# Supplementary material
Source: PubMed Central journal article supplement (PMC7585064)
Supplement: JB.00309-20-s0001.pdf [file JB.00309-20-s0001.pdf]

**Arginine-rich small proteins with a domain of unknown function DUF1127 play a role  
in phosphate and carbon metabolism of *Agrobacterium tumefaciens***

- Supplementary file –

Alexander Kraus<sup>1</sup>, Mareen Weskamp<sup>1</sup>, Jennifer Zierles<sup>1</sup>, Miriam Balzer<sup>1</sup>, Ramona Busch<sup>1</sup>, Jessica Eisfeld<sup>1</sup>,  
Jan Lambertz<sup>2</sup>, Marc M. Nowaczyk<sup>2</sup> and Franz Narberhaus<sup>1,#</sup>

<sup>1</sup>Microbial Biology, Ruhr University Bochum, Bochum, Germany

<sup>2</sup>Plant Biochemistry, Ruhr University Bochum, Bochum, Germany

<sup>#</sup>Address correspondence to [Franz.Narberhaus@ruhr-uni-bochum.de](mailto:Franz.Narberhaus@ruhr-uni-bochum.de)

## Table of contents

|                                                                       |    |
|-----------------------------------------------------------------------|----|
| <b>Abbreviations</b> .....                                            | 3  |
| <b>Explanatory notes to RNA-seq results</b> .....                     | 3  |
| <b>References</b> .....                                               | 3  |
| FIG S1. Alignments of newly discovered DPs with annotated DPs.....    | 4  |
| FIG S2. Transcriptomic data of SDP genes.....                         | 5  |
| FIG S3. Further insights into DP-sub-division.....                    | 6  |
| FIG S4. Deletion of SDP genes.....                                    | 7  |
| FIG S5. Viability and cell morphology of $\Delta\Delta\Delta$ .....   | 9  |
| FIG S6. Sucrose and osmolarity-dependent expression of SDP genes..... | 10 |
| FIG S7. Seedling-infection assay.....                                 | 11 |
| FIG S6. Sucrose and osmolarity-dependent expression of SDP genes..... | 10 |
| Table S1. Strains used in this study.....                             | 13 |
| Table S2. Plasmids used in this study.....                            | 14 |
| Table S3. Plasmid construction.....                                   | 15 |
| Table S4. Oligonucleotides used in this study.....                    | 16 |

## Abbreviations

DP (DUF1127-containing protein), SDP (Short DP), LDP (Large DP), OD (optical density), RNA-seq (RNA sequencing)

## Explanatory notes to RNA-seq results

sRNAs gene names are composed of the corresponding replicon (C1: circular chromosome, C2: linear chromosome, pAt: At-plasmid, pTi: Ti-plasmid), the corresponding position of the transcriptional start site and the orientation of the gene (F: encoded on 'plus' strand, R: encoded on 'minus' strand). The sRNA gene *C2\_1831446F* corresponds to the sRNA L5 (as annotated by Wilms *et al.* (1)).

## References

1. Wilms I, Overlöper A, Nowrousian M, Sharma CM, Narberhaus F. 2012. Deep sequencing uncovers numerous small RNAs on all four replicons of the plant pathogen *Agrobacterium tumefaciens*. *RNA Biol* 9:446–57.
2. Lance GN, Williams WT. 1967. A general theory of classificatory sorting strategies: 1. Hierarchical systems. *Comput J* 9:373–80.
3. Welch BL. 1947. The generalisation of student's problems when several different population variances are involved. *Biometrika* 34:28–35.
4. D. Requião R, Fernandes L, de Souza HJA, Rossetto S, Domitrovic T, Palhano FL. 2017. Protein charge distribution in proteomes and its impact on translation. *PLoS Comput Biol* 13:e1005549.
5. Rumble JR. 2018. Handbook of chemistry and physics 99th edition CRC press/Taylor & Francis, Boca Raton, FL.
6. Hanahan D. 1983. Studies on transformation of *Escherichia coli* with plasmids. *J Mol Biol* 166:557–80.
7. Hoffmann MC, Wagner E, Langklotz S, Pfänder Y, Hött S, Bandow JE, Masepohl B. 2016. Proteome profiling of the *Rhodobacter capsulatus* molybdenum response reveals a role of IscN in nitrogen fixation by Fe-nitrogenase. *J Bacteriol* 198:633–43.
8. Schäfer A, Tauch A, Jäger W, Kalinowski J, Thierbach G, Pühler A. 1994. Small mobilizable multi-purpose cloning vectors derived from the *Escherichia coli* plasmids pK18 and pK19: Selection of defined deletions in the chromosome of *Corynebacterium glutamicum*. *Gene* 145:69–73.
9. Narasimhulu SB, Deng XB, Sarria R, Gelvin SB. 1996. Early transcription of *Agrobacterium* T-DNA genes in tobacco and maize. *Plant Cell* 8:873–86.
10. Pridmore RD. 1987. New and versatile cloning vectors with kanamycin-resistance marker. *Gene* 56:309–12.

**A**

**L4** **MNVTRSFNNWRKYRQTINELGRMSARELHDLGIDRSQITSVARAAVVK**

A0A0F4FNQ6 MNVTRSFNNWRKYRQTINELGRMSARELHDLGIDRSQITSVARAAVVK 100.0%

A0A1G8Y768 MNVTRSFNNWRKYRQTINELGRMSARELHDLGIDRSQITSVARAAVVK 100.0%

A0A1S7QGG0 MNVTRSFNNWRKYRQTINELGRMSTRELHDLGIDRSQITSVARAAVVK 97.9%

F5JAJ7 MNVTRSFNNWRKYRQTINELGRMSTRELHDLGIDRSQITSVARAAVVK 97.9%

A0A024IZE6 MNVTRSFNNWRKYRQTINELGRMSTRELHDLGIDRSQITSVARAAVVK 95.8%

A0A1S7QC19 MNVTRSFNNWRKYRQTINELGRMSSRELHDLGIDRSQITSVARAAVVK 95.8%

A0A1S7RCR0 MNVTRSFNNWRKYRQTINELGRMSSRELHDLGIDRSQITSVARAAVVK 95.8%

A0A1S7RQW2 MNVTRSFNNWRKYRQTINELGRMSTRELHDLGIDRSQITSVARAAVVK 95.8%

A0A1S7S6T7 MNVTRSFNNWRKYRQTINELGRMSTRELHDLGIDRSQITSVARAAVVK 95.8%

A0A1S7U662 MNVTRSFNNWRKYRQTINELGRMSTRELHDLGIDRSQITSVARAAVVK 95.8%

\*\*\*\*\*:\*\*\*\*\*:\*\*\*\*\*

**B**

**Atu1766** **MTMIHYLPATNRSLSLRPSPSGWLDRLLSSHFSARYAEWRRERMLRALEALPPETLKDIGWPTDTRIHAVRK**

A0A1B9SY55 MTMIHYLPVTNRSTHRRPSPIGWLHRLSDQVSARYAEWRRARMLRALEALPPETLKDIGWPTDTRIHAVRK 84.7%

A0A178HA42 MTMIHYLPAANRSTHRRPSSGGWLHRLSSHVSAAYASWRRARMLRALEALPPETLKDIGWPTDNNRISVIRK 79.2%

A0A2V5CI05 MTMIHYLPAANRSTHRRPSSGGWLHRLSSHVSAAYASWRRARMLRALEALPPETLKDIGWPTDNNRISLIRK 79.2%

A0A1S7P179 MTMIHYLPAANRSPHRRPSSGGWLHRLSGHVSALYRSWRRARMLRALEALPPETLKDIGWPTDNYRTNAIRK 76.4%

A0A0Q8FUT7 MTMIHYLPAANRSPHRRPSSGGWLHRLSGHVSALYRSWRRARMLRALEALPPETLKDIGWPTDNYRTNAIRK 76.4%

A0A0L6K5N0 MTMIHYLPAANRSPHRRPSSGGWLHRLSGHVSALYRSWRRARMLRALEALPPETLKDIGWPTDNYRTNAIRK 76.4%

A0A0D8KCQ5 MTMIHYLPAANRSSHRRPSSGGWLHRLSAQVSALYARQRARMLRALEALPPETLKDIGWPTDSSRIRVIRK 73.6%

U4Q4J2 MTMIHYLPAANRSPHRRPSSAGWLQRLSGNIASHYASWRRARMLRALEALPPETLKDIGWPTDNYGRSVIRK 70.8%

K5D188 MTMIHYLPAANRSPHRRPSSAGWLQRLSGNIASHYASWRRARMLRALEALPPETLKDIGWPTDNYGRSVIRK 70.8%

A0A1S9EMK1 MTMIHYLPAANRSPHRRPSSAGWLQRLSGNIASHYASWRRARMLRALEALPPETLKDIGWPTDNYCRSVIRK 70.8%

\*\*\*\*\*.:\*\* \*\* \* \*\* \* \*\* \* :.: \* : \* \*\*\*\*\*:\*\*\*\*\*:\*\*\*\*\*

**C**

**Atu1865** **MQNDQPLVAYALPDAVDRLFVTFGVWTKLKAUVVAAMVPRAPPTDLADLPDRLLVDIGFVPSQVKKRRRDWSVP-WAPRF**

F0L6Y4 MQKNQPLVAYALPDAVDRLFVTFGVWTKLKAUVVAAMVPRPPPTDLSDLPERLLDDIGLEPSDRKMRREWAPPYWAPRF 80.8%

A0A285Y8X8 MQKNQPLVAYALPDAVDRLFVTFGVWTKLKAUVVAAMVPRPPPTDLSDLPERLLDDIGLEPSDRKMRREWAPPYWAPRF 80.8%

A0A1B9V6F4 MQKNQPLVAYALPDAVDRLFVTFGVWTKLKAUVVAAMVPRPPPTDLSDLPERLLDDIGLEPSDRKMRREWAPPYWAPRF 80.8%

H0HBL4 -----MVAYALPDAVDRLFVTFGVWTKLKAUVVAAMVPRPPPTDLSDLPERLLDDIGLEPSDRKMRREWAPPYWAPRF 79.5%

W8FGC7 MQKNQPLVAYALPDAVDRLFVTFGVWTKLKAUVVAAMVPRPPPTDLSDLPERLLDDIGLEPSDRKMRREWAPPYWAPRF 79.5%

A0A1V2AEM7 MQKNQPLVAYALPDAVDRLFVTFGVWTKLKAUVVAAMVPRPPPTDLSDLPERLLDDIGLEPSDRKMRREWAPPYWAPRF 79.5%

A0A1S7SV95 MQKNQPLVAYALPDAVDRLFVTFGVWTKLKAUVVAAMVPRPPPTDLSDLPERLLDDIGLEPSDRKMRREWAPPYWAPRF 79.5%

A0A1S7MPF6 MQKNQPLVAYALPDAVDRLFVTFGVWTKLKAUVVAAMVPRPPPTDLSDLPERLLDDIGLEPSDRKMRREWAPPYWAPRF 79.5%

A0A1S7MJE2 MQKNQPLVAYALPDAVDRLFVTFGVWTKLKAUVVAAMVPRPPPTDLSDLPERLLDDIGLEPSDRKMRREWAPPYWAPRF 79.5%

:\*\*\*\*\*:\*\*\*\*\*:\*\*\*\*\* \*\*\*\*\*:\*\*\*\*\* \*\*\*\*\*:\*\*\*\*\* \*\*\*\*\*: \*\* \* \*\* \* \*\* \* \*\*\*\*\*

**FIG S1.** Alignments of newly discovered DPs with annotated DPs. The proteins most similar to L4 (SDP3), Atu1766 (LDP2) and Atu1865 (LDP4) are shown. The UniProtKB accession number is given on the left, the protein identity compared to the newly discovered DP is given on the right side. Identical aa are marked with an asterisk (\*), highly similar ones with a colon (:), and those with minor similarity with a period (.). Arginine residues are highlighted in yellow.

**A**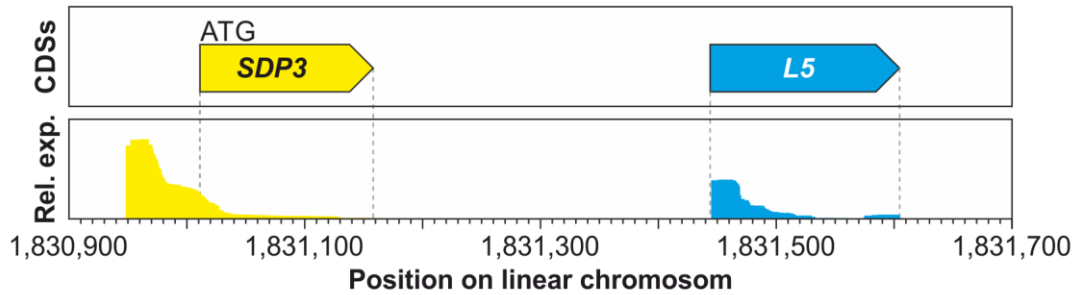**B**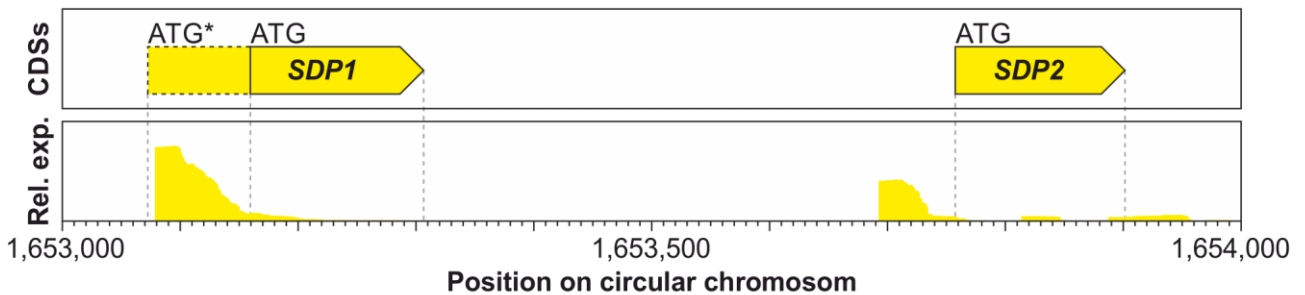

**FIG S2.** Transcriptomic data of SDP genes. In the upper panel relative positions of coding sequences (CDS) are shown. Start codons are marked with ATG. In the lower panel the relative expression (rel. exp.) is shown. Transcriptomic data were taken from Wilms *et al.* (1). SDP genes are marked in yellow and sRNAs in blue. **(A)** *SDP3* and *L5* lie in direct genomic neighborhood but have independent transcription-start sites. **(B)** The previous annotation of the *SDP1* ORF had been incorrect. The previously annotated ORF (*atu1667*, dashed lines) and the corrected ORF (*ATU\_RS08170*, continuous line) are shown as well as the positions of the annotated start codon (ATG\*) and the correct start codon (ATG). The annotated ORF starts at position 1,653,073 on the circular chromosome. The transcription start lies downstream of this annotation at position 1,653,160.

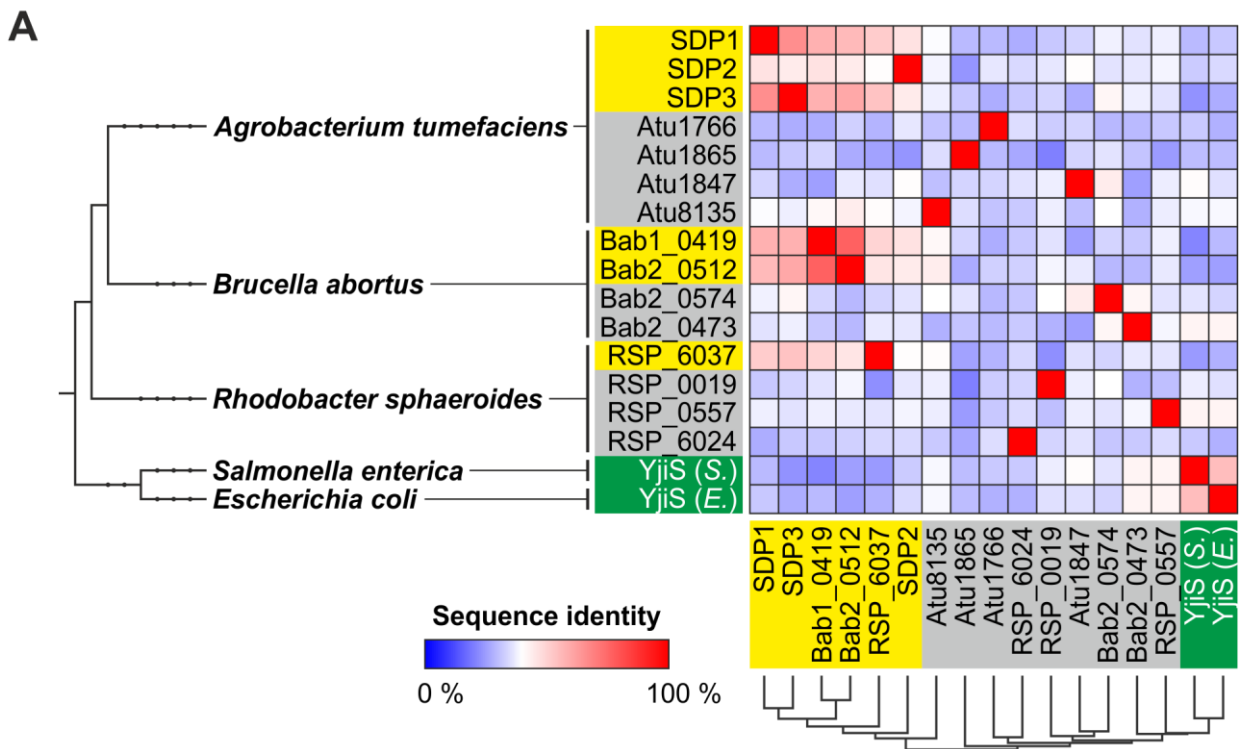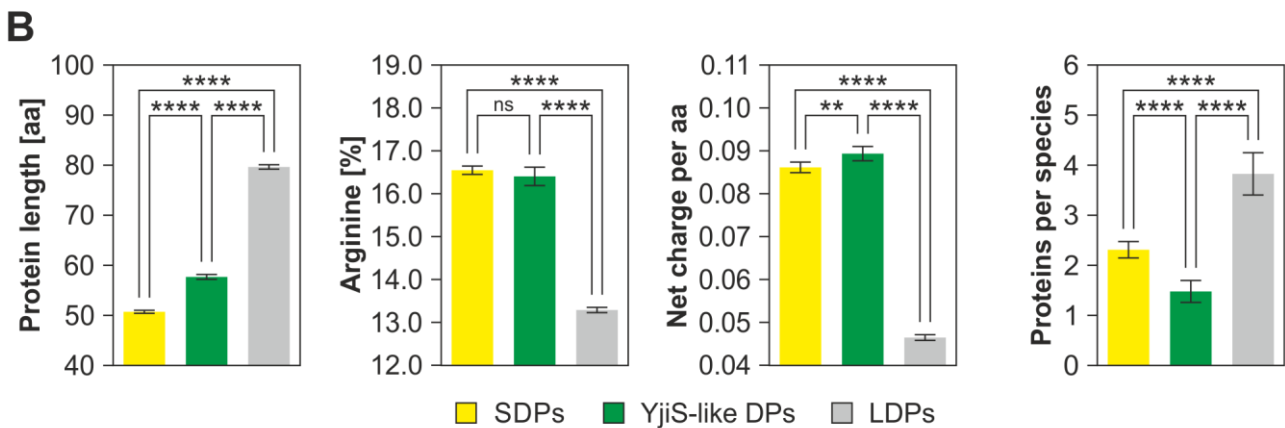

**FIG S3.** Further insights into DP-sub-division. **(A)** Sub-division of DPs that have been subject to previous studies. The proteins were clustered according to the sequence identity to each other via nearest-neighbor-clustering algorithm (2). **(B)** Statistical analyses of DP-sub-class properties concerning protein length, relative arginine content, protein net charge per aa and proteins per species. For each sub-class, means were plotted. Upper and lower border of a 95 % confidence interval are marked as horizontal lines. The corresponding p values were calculated by Welch's t-test (3) and are indicated by asterisks (\*\*\*\*:  $p \leq 0.0001$ , \*\*:  $p \leq 0.01$ , ns (not significant):  $p > 0.05$ ). Protein net charge was calculated using the Henderson-Hasselbalch equation for each N or C terminus and all side chains as described by Requião *et al.* (4). The aa pKa values were taken from "CRC handbook of chemistry and physics" (99th edition) (5).

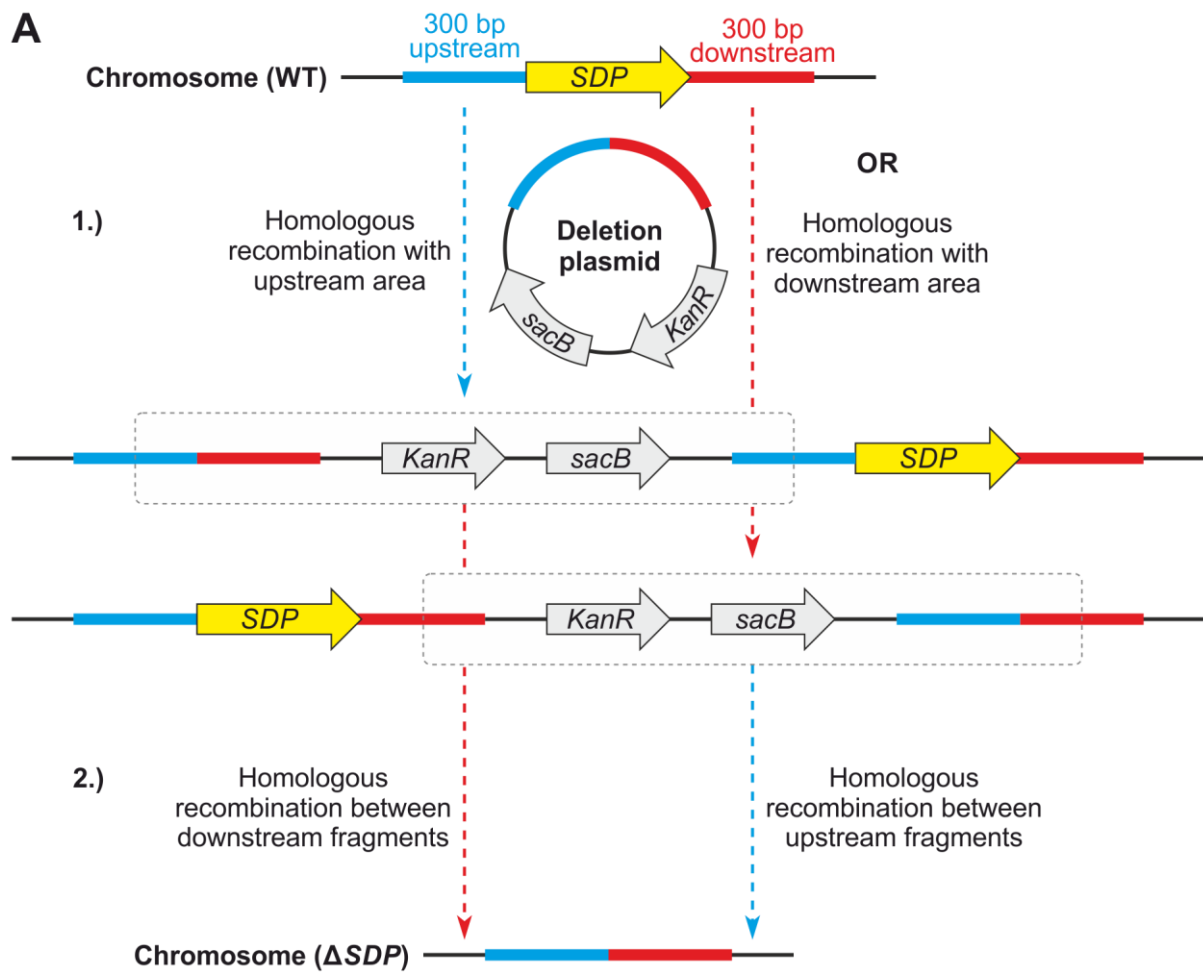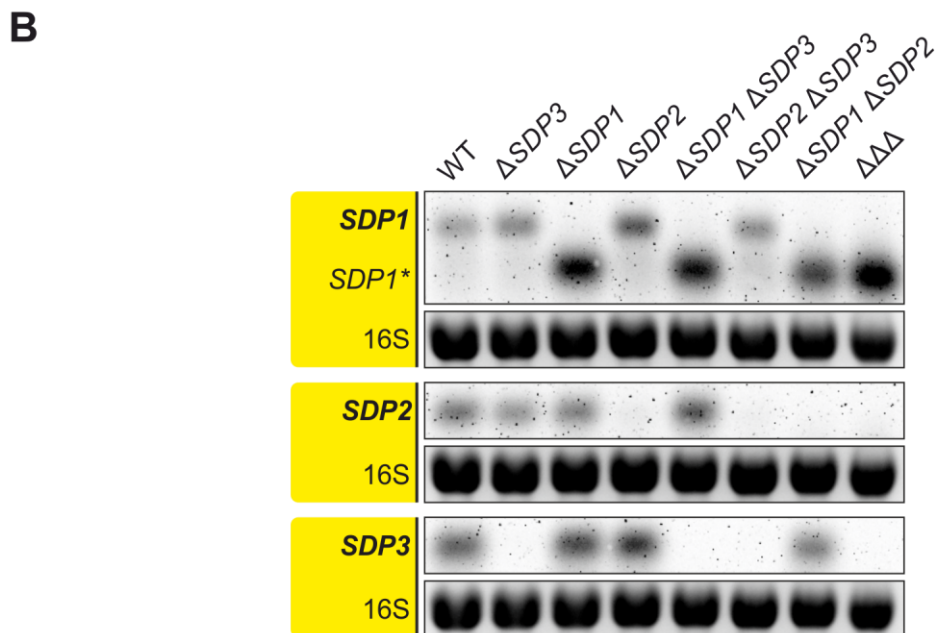

**FIG S4.** Deletion of SDP genes. **(A)** Construction of marker-less deletion mutants. Approximately 300 bp upstream and downstream of the target gene were amplified via PCR and cloned into pK19*mobsacB*. Via single-crossover-homologous recombination with the upstream (left arrow) or the downstream fragment (right arrow) the plasmid was integrated into the genome. Successful integration resulted in resistance against kanamycin (*KanR*). In the second step, cells were exposed to medium containing sucrose, which is

**(FIG S4. Legend continued)** metabolized into toxic levels of levan by SacB. This forces the cells to excise the plasmid via homologous recombination again. Since recombination between upstream fragments or downstream fragments are similarly likely, this can either result in restoration of the WT or in successful marker-less gene deletion. **(B)** Northern-blot analysis verified successful construction of all seven deletion strains. All single, double and triple-deletion mutants ( $\Delta\Delta\Delta$ ) were created by the scheme presented in (A). A truncated transcript of the *SDP1* mRNA (*SDP1\**) was detected, because only the protein-coding sequences of *SDP1* and *SDP2* were deleted, but not the UTRs. EtBr-stained 16S rRNA served as loading control.



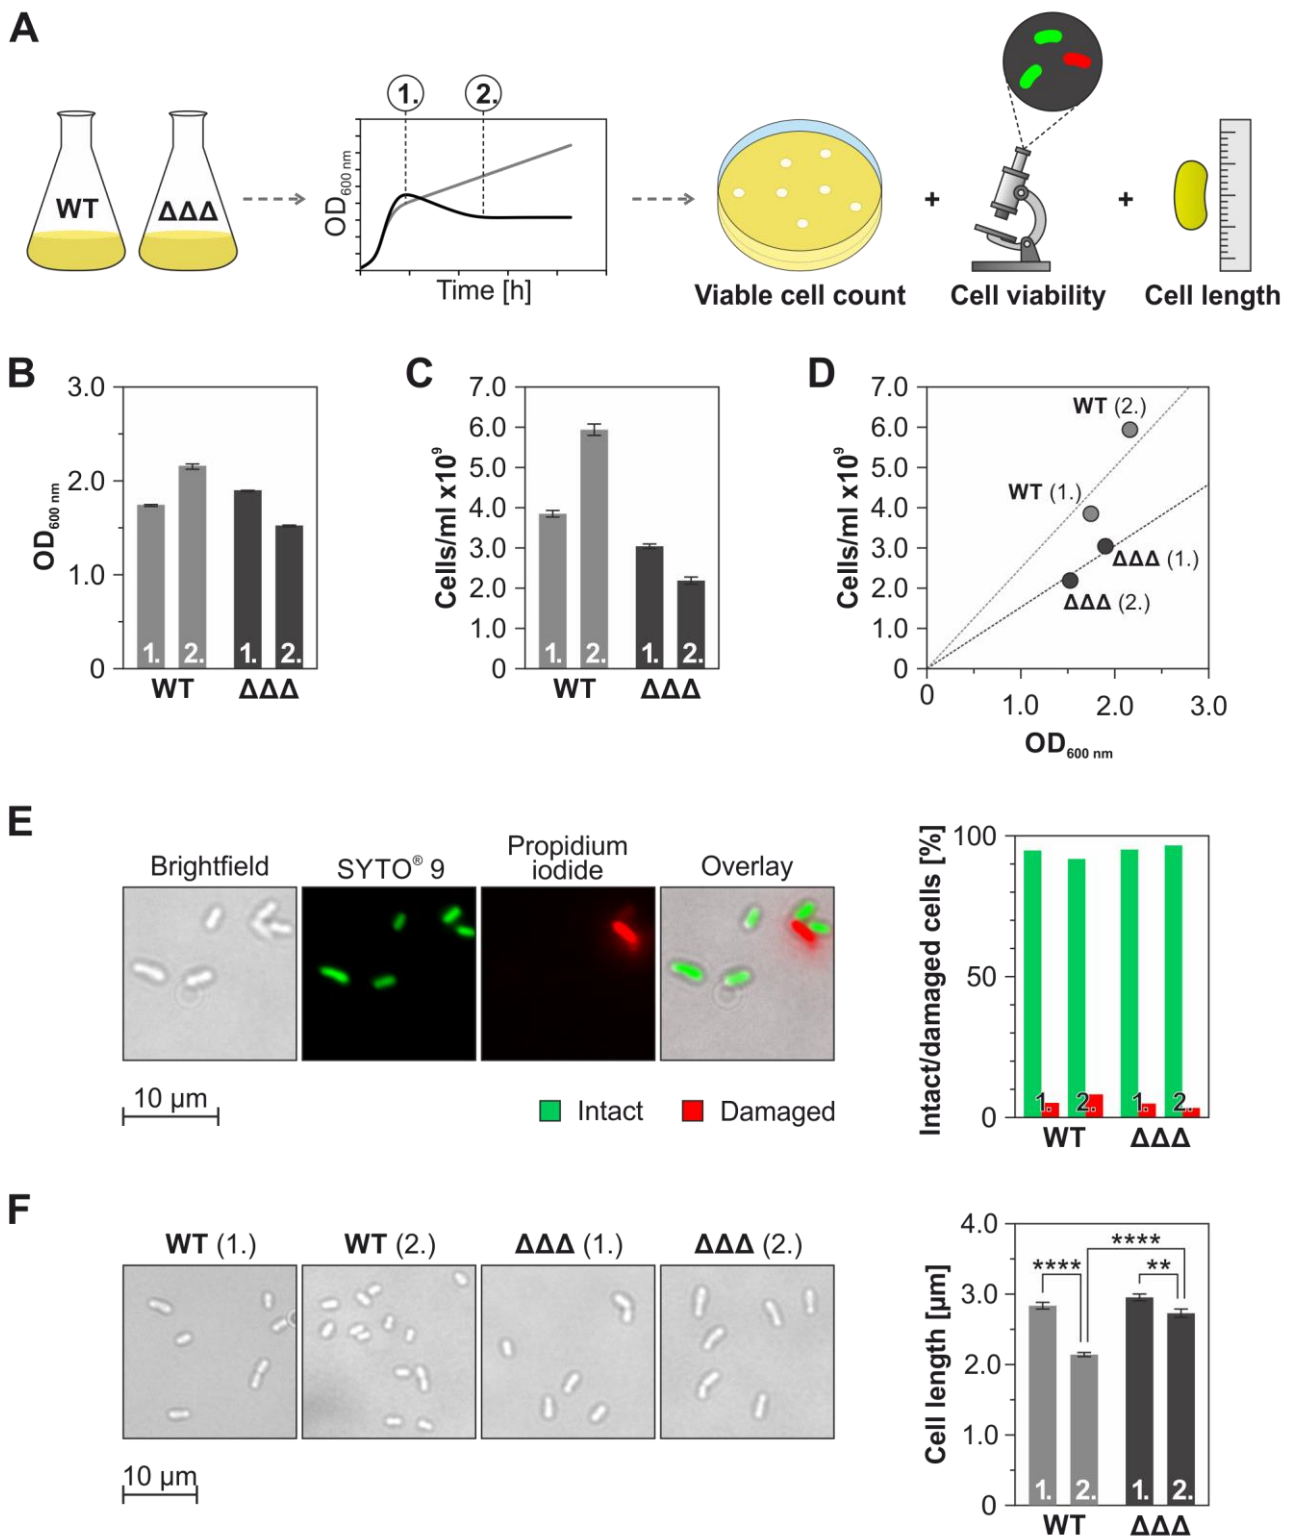

**FIG S5.** Viability and cell morphology of  $\Delta\Delta\Delta$ . **(A)** To investigate whether the declining  $OD_{600\text{ nm}}$  of  $\Delta\Delta\Delta$  correlates with the cell number several assays were performed at two points of time: after approximately 12 h of growth and after approximately 24 h. Viable cells were determined by plate counting. To determine the relative amount of dead cells a *LIVE/DEAD BacLight*<sup>TM</sup> bacterial viability assay was quantified by counting cells under the microscope. The cell length was measured under the microscope using the ImageJ software. **(B-D)**  $OD_{600\text{ nm}}$  and cell number correlate with each other. The  $OD_{600\text{ nm}}$  and the viable cell count of the WT

**(FIG S5. Legend continued)** increased over night, whereas OD<sub>600 nm</sub> and cell number of  $\Delta\Delta\Delta$  decreased. An increased OD<sub>600 nm</sub> went along with an increased number of cells. **(E)**  $\Delta\Delta\Delta$  and WT showed a similar amount of damaged cells. Via *LIVE/DEAD BacLight*<sup>TM</sup> assay, intact cells were stained with a green-fluorescent dye (SYTO® 9) and damaged cells were stained with a red-fluorescent dye (propidium iodide). Cells were counted via fluorescence microscopy. **(F)** Cell length of  $\Delta\Delta\Delta$  decreased to a minor extent on day two compared to the WT. The corresponding p values were calculated by Welch's *t*-test and are indicated by asterisks (\*\*\*\*:  $p \leq 0.0001$ , \*\*:  $p \leq 0.01$ ).

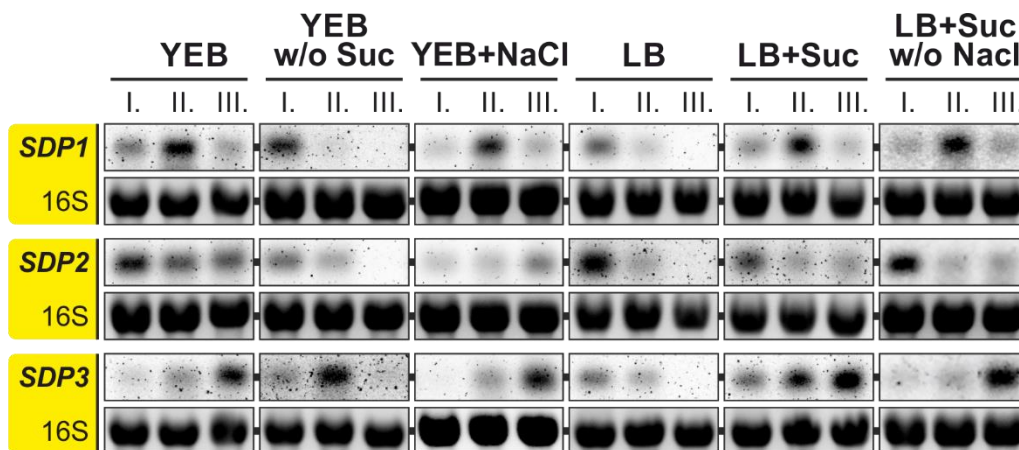

**FIG S6.** Sucrose and osmolarity-dependent expression of SDP genes. Samples for Northern blot analyses were taken at the indicated time points (see Fig. 8). EtBr-stained 16S rRNA served as loading control

**A**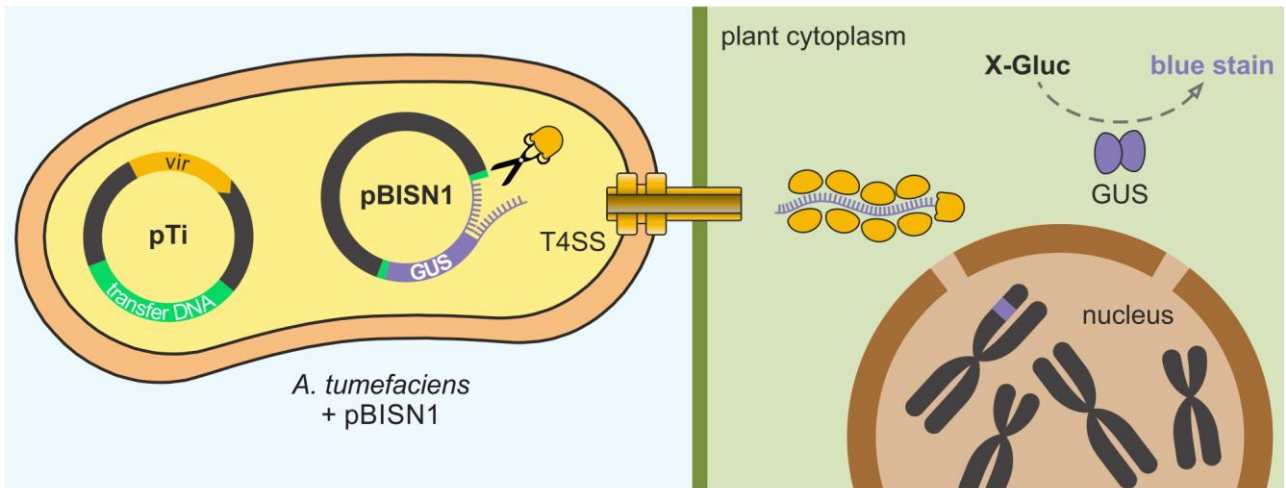**B**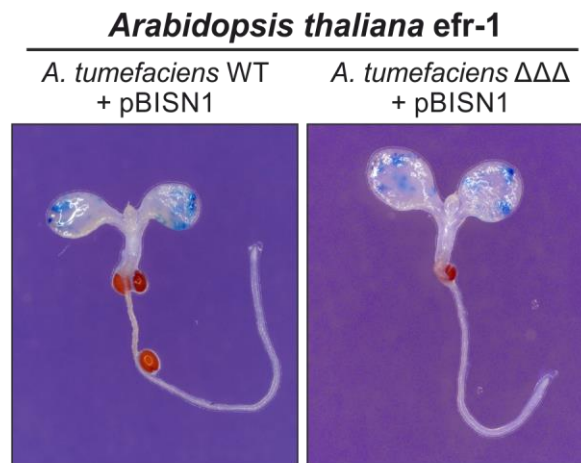

**FIG S7.** Seedling-infection assay. **(A)** *A. tumefaciens* is transformed with pBISN1 which contains a GUS gene under control of a so-called super-promoter between the two T-DNA borders. A single strand of the GUS gene is cleaved and transported into the plant host. It is translocated into the nucleus and integrated into the genome at a random position. GUS converts X-Gluc into a blue stain, which indicates a successful infection by *A. tumefaciens*. **(B)**  $\Delta\Delta\Delta$  is able to infect the *A. thaliana efr-1* mutant. Blue stained spots indicate infection by *A. tumefaciens* transformed with pBISN1.

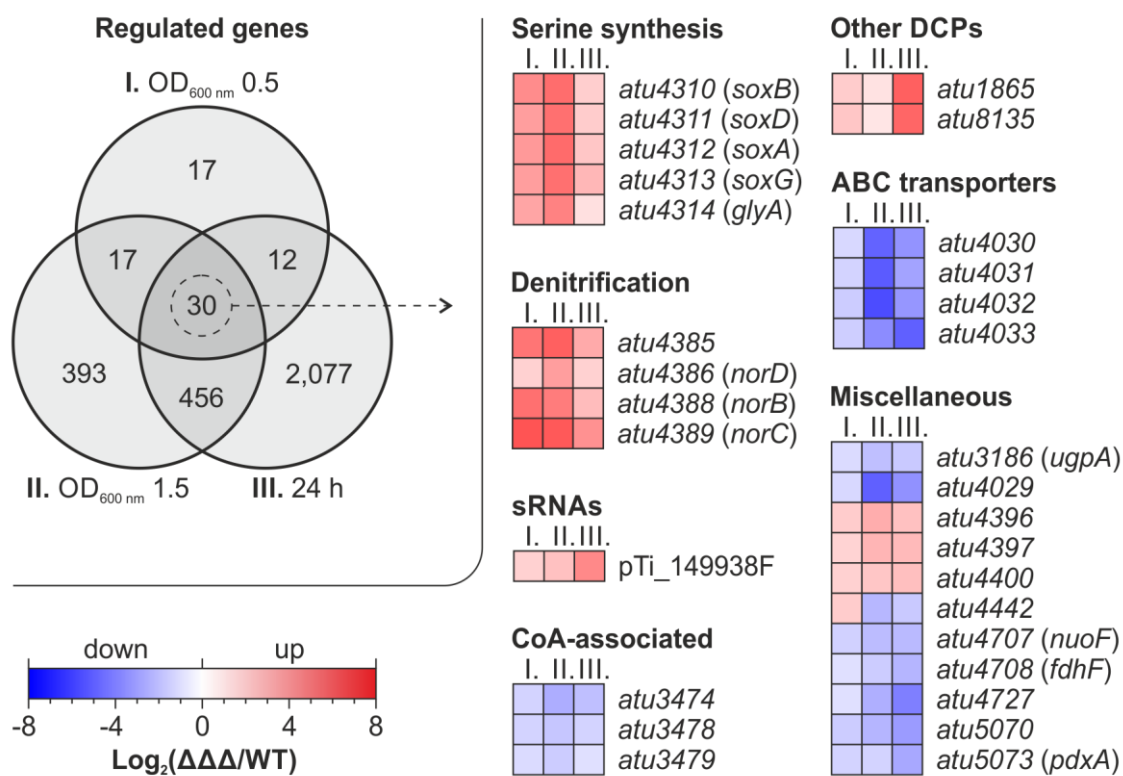

**FIG S8.** Differentially expressed genes in  $\Delta\Delta\Delta$ . The transcriptome of  $\Delta\Delta\Delta$  was compared with the WT via RNA-seq at OD<sub>600 nm</sub> 0.5, at 1.5 and after 24 h of growth. The 30 genes that were differentially expressed at all three points of time are listed on the right. The color code represents the binary logarithm of the fold change in  $\Delta\Delta\Delta$  compared to the WT.

**Table S1.** Strains used in this study.

| Strain                                                                                       | Description                                                                                                                                                                               | Source                     |
|----------------------------------------------------------------------------------------------|-------------------------------------------------------------------------------------------------------------------------------------------------------------------------------------------|----------------------------|
| <i>A. tumefaciens</i> C58                                                                    | WT strain (alias <i>Agrobacterium fabrum</i> C58).                                                                                                                                        | C. Baron, Montréal, Canada |
| <i>A. tumefaciens</i> C58 $\Delta L4$                                                        | Marker-less deletion of <i>L4</i> with pDel_ <i>L4</i> in <i>A. tumefaciens</i> C58.                                                                                                      | This study                 |
| <i>A. tumefaciens</i> C58 $\Delta atu1667$                                                   | Marker-less deletion of <i>atu1667</i> with pDel_ <i>atu1667</i> in <i>A. tumefaciens</i> C58.                                                                                            | This study                 |
| <i>A. tumefaciens</i> C58 $\Delta atu8161$                                                   | Marker-less deletion of <i>atu8161</i> with pDel_ <i>atu8161</i> in <i>A. tumefaciens</i> C58.                                                                                            | This study                 |
| <i>A. tumefaciens</i> C58 $\Delta L4 \Delta atu1667$                                         | Marker-less deletion of <i>atu1667</i> with pDel_ <i>atu1667</i> in <i>A. tumefaciens</i> $\Delta L4$ .                                                                                   | This study                 |
| <i>A. tumefaciens</i> C58 $\Delta L4 \Delta atu8161$                                         | Marker-less deletion of <i>L4</i> with pDel_ <i>L4</i> in <i>A. tumefaciens</i> $\Delta atu8161$ .                                                                                        | This study                 |
| <i>A. tumefaciens</i> C58 $\Delta atu1667 \Delta atu8161$                                    | Marker-less deletion of <i>atu8161</i> with pDel_ <i>atu8161</i> in <i>A. tumefaciens</i> $\Delta atu1667$ .                                                                              | This study                 |
| <i>A. tumefaciens</i> C58 $\Delta L4 \Delta atu1667 \Delta atu8161$ ( $\Delta\Delta\Delta$ ) | Marker-less deletion of <i>atu1667</i> with pDel_ <i>atu1667</i> in <i>A. tumefaciens</i> $\Delta L4 \Delta atu8161$ .                                                                    | This study                 |
| <i>A. tumefaciens</i> C58 $\Delta IsrB$                                                      | Knock-out of <i>atu2186</i> ( <i>IsrB</i> ) in <i>A. tumefaciens</i> C58 with pKO_ <i>IsrB</i> . Gentamycin resistant.                                                                    | This study                 |
| <i>A. tumefaciens</i> C58 + EV                                                               | <i>A. tumefaciens</i> C58 with chromosomal integration of plnt_ EV. Kanamycin resistant.                                                                                                  | This study                 |
| <i>A. tumefaciens</i> C58 $\Delta\Delta\Delta$ + EV                                          | <i>A. tumefaciens</i> $\Delta\Delta\Delta$ with chromosomal integration of plnt_ EV. Kanamycin resistant.                                                                                 | This study                 |
| <i>A. tumefaciens</i> C58 $\Delta\Delta\Delta$ + <i>L4</i>                                   | <i>A. tumefaciens</i> $\Delta\Delta\Delta$ with chromosomal integration of plnt_ <i>L4</i> . Kanamycin resistant.                                                                         | This study                 |
| <i>A. tumefaciens</i> C58 + <i>L4</i> <sup>3xFLAG</sup>                                      | Chromosomal integration of <i>L4</i> <sup>3xFLAG</sup> under control of native promoter. Cloned via recombination with plnt_ <i>L4</i> <sup>3xFLAG</sup> . Kanamycin resistant.           | This study                 |
| <i>A. tumefaciens</i> C58 + <i>atu1667</i> <sup>3xFLAG</sup>                                 | Chromosomal integration of <i>atu1667</i> <sup>3xFLAG</sup> under control of native promoter. Cloned via recombination with plnt_ <i>atu1667</i> <sup>3xFLAG</sup> . Kanamycin resistant. | This study                 |
| <i>A. tumefaciens</i> C58 + <i>atu8161</i> <sup>3xFLAG</sup>                                 | Chromosomal integration of <i>atu8161</i> <sup>3xFLAG</sup> under control of native promoter. Cloned via recombination with plnt_ <i>atu8161</i> <sup>3xFLAG</sup> . Kanamycin resistant. | This study                 |
| <i>A. tumefaciens</i> C58 + <i>atu1766</i> <sup>3xFLAG</sup>                                 | Chromosomal integration of <i>atu1766</i> <sup>3xFLAG</sup> under control of native promoter. Cloned via recombination with plnt_ <i>atu1766</i> <sup>3xFLAG</sup> . Kanamycin resistant. | This study                 |
| <i>A. tumefaciens</i> C58 + <i>atu1865</i> <sup>3xFLAG</sup>                                 | Chromosomal integration of <i>atu1865</i> <sup>3xFLAG</sup> under control of native promoter. Cloned via recombination with plnt_ <i>atu1865</i> <sup>3xFLAG</sup> . Kanamycin resistant. | This study                 |
| <i>A. tumefaciens</i> C58 + <i>atu1847</i> <sup>3xFLAG</sup>                                 | Chromosomal integration of <i>atu1847</i> <sup>3xFLAG</sup> under control of native promoter. Cloned via recombination with plnt_ <i>atu1847</i> <sup>3xFLAG</sup> . Kanamycin resistant. | This study                 |
| <i>A. tumefaciens</i> C58 + <i>atu8135</i> <sup>3xFLAG</sup>                                 | Chromosomal integration of <i>atu8135</i> <sup>3xFLAG</sup> under control of native promoter. Cloned via recombination with plnt_ <i>atu8135</i> <sup>3xFLAG</sup> . Kanamycin resistant. | This study                 |

**Table S1.** (Continued)

| Strain              | Description                                                                                             | Source |
|---------------------|---------------------------------------------------------------------------------------------------------|--------|
| <i>E. coli</i> JM83 | Cloning strain. <i>rpsL</i> , <i>ara</i> , $\Delta(lac-proAB)$ , $\Phi 80$ , <i>dIacZ</i> $\Delta$ M15. | (6)    |

**Table S2.** Plasmids used in this study. A detailed description on how plasmids were constructed is given in Tab. S3.

| Plasmid                                | Description                                                                                                 | Source                |
|----------------------------------------|-------------------------------------------------------------------------------------------------------------|-----------------------|
| pK19 <i>mobsacB</i>                    | Cloning vector.                                                                                             | (8)                   |
| pDel_ <i>L4</i>                        | For marker-less deletion of <i>L4</i> . Constructed from pK19 <i>mobsacB</i> .                              | This study            |
| pDel_ <i>atu1667</i>                   | For marker-less deletion of <i>atu1667</i> . Constructed from pK19 <i>mobsacB</i> .                         | This study            |
| pDel_ <i>atu8161</i>                   | For marker-less deletion of <i>atu8161</i> . Constructed from pK19 <i>mobsacB</i> .                         | This study            |
| pYP240I                                | Cloning vector.                                                                                             | Masepohl, unpublished |
| pYP4II                                 | Cloning vector.                                                                                             | Masepohl, unpublished |
| pKO_ <i>IsrB</i>                       | For knock-out of <i>atu2186</i> ( <i>IsrB</i> ).                                                            | This study            |
| pK18                                   | Cloning vector.                                                                                             | (10)                  |
| pInt_EV                                | Empty vector control for integration via single-crossover. Contains <i>L4</i> -UTRs. Constructed from pK18. | This study            |
| pInt_ <i>L4</i>                        | For reintegration of <i>L4</i> in $\Delta\Delta\Delta$ via single-crossover. Constructed from pK18.         | This study            |
| pYP247                                 | Cloning vector.                                                                                             | (7)                   |
| pInt_ <i>L4</i> <sup>3xFLAG</sup>      | For chromosomal <i>L4</i> <sup>3xFLAG</sup> via single-crossover. Constructed from pK18.                    | This study            |
| pInt_ <i>atu1667</i> <sup>3xFLAG</sup> | For chromosomal <i>atu1667</i> <sup>3xFLAG</sup> via single-crossover. Constructed from pK18.               | This study            |
| pInt_ <i>atu8161</i> <sup>3xFLAG</sup> | For chromosomal <i>atu8161</i> <sup>3xFLAG</sup> via single-crossover. Constructed from pK18.               | This study            |
| pInt_ <i>atu1766</i> <sup>3xFLAG</sup> | For chromosomal <i>atu1766</i> <sup>3xFLAG</sup> via single-crossover. Constructed from pK18.               | This study            |
| pInt_ <i>atu1865</i> <sup>3xFLAG</sup> | For chromosomal <i>atu1865</i> <sup>3xFLAG</sup> via single-crossover. Constructed from pK18.               | This study            |
| pInt_ <i>atu1847</i> <sup>3xFLAG</sup> | For chromosomal <i>atu1847</i> <sup>3xFLAG</sup> via single-crossover. Constructed from pK18.               | This study            |
| pInt_ <i>atu8135</i> <sup>3xFLAG</sup> | For chromosomal <i>atu8135</i> <sup>3xFLAG</sup> via single-crossover. Constructed from pK18.               | This study            |
| pBISN1                                 | For seedling infection assays.                                                                              | (9)                   |

**Table S3.** Plasmid construction. The plasmids that were constructed in this study are listed with a detailed cloning scheme. For each PCR the primer numbers are given (see Tab. S4). The template is given in parentheses whenever it was not *A. tumefaciens* DNA. The nucleases in parentheses indicate that a DNA fragment was digested prior to ligation.

| Plasmid                        | Cloning scheme                                                                                                                                                                                                                                                                             |
|--------------------------------|--------------------------------------------------------------------------------------------------------------------------------------------------------------------------------------------------------------------------------------------------------------------------------------------|
| pDel_L4                        | - PCR <sub>1</sub> : 1 + 2<br>- PCR <sub>2</sub> : 3 + 4<br>- Ligation <sub>1</sub> : PCR <sub>1</sub> (BamHI) + PCR <sub>2</sub> (BamHI)<br>- Ligation <sub>2</sub> : pK19 <i>mobsacB</i> (PstI, HindIII) + Ligation <sub>1</sub> (PstI, HindIII)                                         |
| pDel_atu1667                   | - PCR <sub>1</sub> : 5 + 6<br>- PCR <sub>2</sub> : 7 + 8<br>- Ligation <sub>1</sub> : PCR <sub>1</sub> (BsaI) + PCR <sub>2</sub> (BsaI)<br>- Ligation <sub>2</sub> : pK19 <i>mobsacB</i> (PstI) + Ligation <sub>1</sub> (PstI)                                                             |
| pDel_atu8161                   | - PCR <sub>1</sub> : 9 + 10<br>- PCR <sub>2</sub> : 11 + 12<br>- Ligation <sub>1</sub> : PCR <sub>1</sub> (BsaI) + PCR <sub>2</sub> (BsaI)<br>- Ligation <sub>2</sub> : pK19 <i>mobsacB</i> (PstI) + Ligation <sub>1</sub> (PstI)                                                          |
| pKO_IsrB                       | - PCR <sub>1</sub> : 13 + 14<br>- Ligation <sub>1</sub> : pYP240I (KpnI, Sall) + PCR <sub>1</sub> (KpnI, Sall)<br>- Restriction <sub>1</sub> : pYP4II (EcoRI, PstI) → Gm <sup>R</sup> cassette<br>- Ligation <sub>2</sub> : Ligation <sub>1</sub> (EcoRI, PstI) + Restriction <sub>1</sub> |
| pInt_EV                        | - PCR <sub>1</sub> : 15 + 16<br>- PCR <sub>2</sub> : 17 + 18<br>- Ligation <sub>1</sub> : PCR <sub>1</sub> (XbaI) + PCR <sub>2</sub> (XbaI)<br>- Ligation <sub>2</sub> : pK18 (HindIII, PstI) + Ligation <sub>1</sub> (HindIII, PstI)                                                      |
| pInt_L4                        | - PCR: 19 + 20<br>- Ligation: pK18 (PstI, SmaI) + PCR (PstI, SmaI)                                                                                                                                                                                                                         |
| pInt_L4 <sup>3xFLAG</sup>      | - PCR <sub>1</sub> : 21 + 22<br>- PCR <sub>2</sub> : 35 + 36 (pYP247)<br>- Ligation <sub>1</sub> : PCR <sub>1</sub> (Sall) + PCR <sub>2</sub> (Sall)<br>- Ligation <sub>2</sub> : pK18 (Acc65I, PstI) + Ligation <sub>1</sub> (Acc65I, PstI)                                               |
| pInt_atu1667 <sup>3xFLAG</sup> | - PCR <sub>1</sub> : 23 + 24<br>- PCR <sub>2</sub> : 35 + 36 (pYP247)<br>- Ligation <sub>1</sub> : PCR <sub>1</sub> (Sall) + PCR <sub>2</sub> (Sall)<br>- Ligation <sub>2</sub> : pK18 (Acc65I, PstI) + Ligation <sub>1</sub> (Acc65I, PstI)                                               |
| pInt_atu8161 <sup>3xFLAG</sup> | - PCR <sub>1</sub> : 25 + 26<br>- PCR <sub>2</sub> : 35 + 36 (pYP247)<br>- Ligation <sub>1</sub> : PCR <sub>1</sub> (Sall) + PCR <sub>2</sub> (Sall)<br>- Ligation <sub>2</sub> : pK18 (Acc65I, PstI) + Ligation <sub>1</sub> (Acc65I, PstI)                                               |
| pInt_atu1766 <sup>3xFLAG</sup> | - PCR: 27 + 28<br>- Ligation: pInt_L4 <sup>3xFLAG</sup> (EcoRI, PstI) + PCR (EcoRI, PstI)                                                                                                                                                                                                  |
| pInt_atu1865 <sup>3xFLAG</sup> | - PCR: 29 + 30<br>- Ligation: pInt_L4 <sup>3xFLAG</sup> (EcoRI, PstI) + PCR (EcoRI, PstI)                                                                                                                                                                                                  |
| pInt_atu1847 <sup>3xFLAG</sup> | - PCR <sub>1</sub> : 31 + 32<br>- PCR <sub>2</sub> : 35 + 36 (pYP247)<br>- Ligation <sub>1</sub> : PCR <sub>1</sub> (Sall) + PCR <sub>2</sub> (Sall)<br>- Ligation <sub>2</sub> : pK18 (Acc65I, PstI) + Ligation <sub>1</sub> (Acc65I, PstI)                                               |
| pInt_atu8135 <sup>3xFLAG</sup> | - PCR <sub>1</sub> : 33 + 34<br>- PCR <sub>2</sub> : 35 + 36 (pYP247)<br>- Ligation <sub>1</sub> : PCR <sub>1</sub> (Sall) + PCR <sub>2</sub> (Sall)<br>- Ligation <sub>2</sub> : pK18 (Acc65I, PstI) + Ligation <sub>1</sub> (Acc65I, PstI)                                               |

**Table S4.** Oligonucleotides used in this study.

| No. | Primer name                            | Sequence                                           | Designated use                                 |
|-----|----------------------------------------|----------------------------------------------------|------------------------------------------------|
| 1   | DelUp_L4_fwd                           | TTTTCTGCAGGTTCCGGCAAGGGTTTTAC                      | Construction of pDel_L4                        |
| 2   | DelUp_L4_rev                           | TTTTGGATCCGTGCAATGGTTCCAATTTACC                    |                                                |
| 3   | DelDown_L4_fwd                         | TTTTGGATCCAACAATTGGCGCAAATATCG                     |                                                |
| 4   | DelDown_L4_rev                         | TTTTAAGCTTGAAGATAGCATTTTTCTGCG                     |                                                |
| 5   | DelUp_atu1667_fwd                      | TTTTCTGCAGCCCCGTGTCAAACCCCGC                       | Construction of pDel_atu1667                   |
| 6   | DelUp_atu1667_rev                      | TTTTGGTCTCATTTTCATCTTCTCTTCGTGCTGTC                |                                                |
| 7   | DelDown_atu1667_fwd                    | TTTTGGTCTCAGAAAATAAAAACGGCCCGCCGC                  |                                                |
| 8   | DelDown_atu1667_rev                    | TTTTCTGCAGATGCATTTGTGCACTATGTCGGC                  |                                                |
| 9   | DelUp_atu8161_fwd                      | TTTTCTGCAGCAAACGCATGCGTCAAAGCAGC                   | Construction of pDel_atu8161.                  |
| 10  | DelUp_atu8161_rev                      | TTTTGGTCTCAGATCGTTTCTCAATCTTTCTTTGATTTTC           |                                                |
| 11  | DelDown_atu8161_fwd                    | TTTTGGTCTCAGATCGGGCGTAAAAGATCGTCCCGC               |                                                |
| 12  | DelDown_atu8161_rev                    | TTTTCTGCAGCTCGGGGACGCGGCATTGTTG                    |                                                |
| 13  | KO_IsrB_fwd                            | TTTTGTGACAAGGCAGGATAGGCATGGCA                      | Construction of pKO_IsrB                       |
| 14  | KO_IsrB_rev                            | TTTTGGTACCGATTATCTTTGACGTCGATTAT                   |                                                |
| 15  | IntUp_EV_fwd                           | TTTTAAGCTTTCATGTGGCTGAATTTTCAGCGGTCAC              | Construction of plnt_EV                        |
| 16  | IntUp_EV_rev                           | TTTTTCTAGAGGTCTCACATGACATGACCCCTTTCTGAGGTTTAGG     |                                                |
| 17  | IntDown_EV_fwd                         | TTTTTCTAGAAGGTCTCATAAATGCAGGCGATATCGCCACTTATAAATAC |                                                |
| 18  | IntDown_EV_rev                         | TTTTCTGCAGGAGAGCCATGGAACAAAGGGC                    |                                                |
| 19  | Int_L4_fwd                             | TTTTGGTACCCATGTGGCTGAATTTTCAGCGGTCAC               | Construction of plnt_L4                        |
| 20  | Int_L4_rev                             | TTTTCTGCAGGAGAGCCATGGAACAAAGGGC                    |                                                |
| 21  | Int_L4 <sup>3xFLAG</sup> _fwd          | TTTTGGTACCATCAAAGGACGCCGG                          | Construction of plnt_L4 <sup>3xFLAG</sup>      |
| 22  | Int_L4 <sup>3xFLAG</sup> _rev          | TTTTGTGACCTTGCCGACGGCGG                            |                                                |
| 23  | Int_atu1667 <sup>3xFLAG</sup> _fwd     | TTTTGGTACCGGGTCAATTTACCGGC                         | Construction of plnt_atu1667 <sup>3xFLAG</sup> |
| 24  | Int_atu1667 <sup>3xFLAG</sup> _rev     | TTTTGTGACGAAGCCGACGGCGG                            |                                                |
| 25  | Int_atu8161 <sup>3xFLAG</sup> _fwd     | TTTTGGTACCTCAACAGCCGAGAGC                          | Construction of plnt_atu8161 <sup>3xFLAG</sup> |
| 26  | Int_atu8161 <sup>3xFLAG</sup> _rev     | TTTTGTGACGCGGAACGAACGGGAAG                         |                                                |
| 27  | Int_atu1766 <sup>3xFLAG</sup> _fwd     | TTTTGAATTCGGTACCATGATACATTATCTGCCGGCGAC            | Construction of plnt_atu1766 <sup>3xFLAG</sup> |
| 28  | Int_atu1766 <sup>3xFLAG</sup> _rev     | TTTTGTGCACTTTGCGGACGGCGTGTATGCGG                   |                                                |
| 29  | Int_atu1865 <sup>3xFLAG</sup> _fwd     | TTTTGAATTCGGTACCATTGGTAGCATATGCCGCTGC              | Construction of plnt_atu1865 <sup>3xFLAG</sup> |
| 30  | Int_atu1865 <sup>3xFLAG</sup> _rev     | TTTTGTGACAAAACCGCGGCCACCGGTAC                      |                                                |
| 31  | Int_atu1847 <sup>3xFLAG</sup> _fwd     | TTTTGGTACCGCAAGATGGATCAATACCTTTTCGAC               | Construction of plnt_atu1847 <sup>3xFLAG</sup> |
| 32  | Int_atu1847 <sup>3xFLAG</sup> _rev     | TTTTGTGACGAGGGACCGCGTCCGCCAG                       |                                                |
| 33  | Int_atu8135 <sup>3xFLAG</sup> _fwd     | TTTTGGTACCATGCGCACGGCAGAACGGAG                     | Construction of plnt_atu8135 <sup>3xFLAG</sup> |
| 34  | Int_atu8135 <sup>3xFLAG</sup> _rev     | TTTTGTGACAAGCGTCTTGAACGCGTGAC                      |                                                |
| 35  | 3xFLAG_fwd                             | TTTTGTGCACTACAAAGACCATGACG                         | C-terminal 3xFLAG-tag fusions                  |
| 36  | 3xFLAG_rev                             | TTTTCTGCAGGGATCTTATCATTATCGTC                      |                                                |
| 37  | TestDel_L4_fwd                         | CACGCCGTCCATGTGGCTG                                | Check deletion of L4                           |
| 38  | TestDel_L4_rev                         | GTGCAGTTCACGGGCGCTC                                |                                                |
| 39  | TestDel_atu1667_fwd                    | GGTCAATTTACCGGCTTGCCCTTGC                          | Check deletion of atu1667                      |
| 40  | TestDel_atu1667_rev                    | GCCAGAGACGGGAGCCCTCAGG                             |                                                |
| 41  | TestDel_atu8161_fwd                    | CCGCAAATTTAGCCGACATAGTGCAC                         | Check deletion of atu8161                      |
| 42  | TestDel_atu8161_rev                    | CGCTTTTCAAAGGCTGTTTCTCC                            |                                                |
| 43  | TestKO_IsrB_fwd                        | TCCTGCAGGAACGGCTGTTT                               | Check knock-out of IsrB                        |
| 44  | TestKO_IsrB_rev                        | GTCACGTCTCTGTGAGCATC                               |                                                |
| 45  | TestInt_L4_fwd                         | GCGCGACGAACGCTAACGTTTTTCGGC                        | Check <i>A. tumefaciens</i> ΔΔΔ + L4           |
| 46  | TestInt_L4_rev                         | GGTTTAGGTGACGTGACCAACGTTTTTCGTTT                   |                                                |
| 47  | TestInt_L4_rev2                        | GTCACGACGTTGTAAAACGACGGCCAGTG                      |                                                |
| 48  | TestInt_L4 <sup>3xFLAG</sup> _fwd      | GGCATGATAAAGCGCATATAGAGGG                          |                                                |
| 49  | TestInt_atu1667 <sup>3xFLAG</sup> _fwd | GCGTTTTCTGTCATAGGTGACATC                           | Check integration of 3xFLAG                    |
| 50  | TestInt_atu8161 <sup>3xFLAG</sup> _fwd | CACTGCACAACATGGCCTAATGTC                           |                                                |
| 51  | TestInt_atu1766 <sup>3xFLAG</sup> _fwd | GGATCGTGGTTCACGAAAGGATC                            |                                                |
| 52  | TestInt_atu1865 <sup>3xFLAG</sup> _fwd | GGGATGGATTTCCCATGCAAATGATC                         |                                                |
| 53  | TestInt_atu1847 <sup>3xFLAG</sup> _fwd | GCATTGAATGACATCAAACACCGG                           |                                                |
| 54  | TestInt_atu8135 <sup>3xFLAG</sup> _fwd | CCAAGCAAATCAGTATCAACCTGG                           |                                                |
| 55  | Test_3xFLAG_rev                        | CACCGTCATGGTCTTTGTAGTCG                            |                                                |
| 56  | Probe_L4_fwd                           | ATCAAAGGACGCGGAAACG                                |                                                |
| 57  | Probe_L4_rev                           | GAAATTAATACGACTCACTATAGGGCATGACATGACCCCTTTCTG      |                                                |



**Table S4.** (Continued)

| No. | Primer name       | Sequence                                          | Designated use                                  |
|-----|-------------------|---------------------------------------------------|-------------------------------------------------|
| 58  | Probe_atu1667_fwd | ATACAGAGATCAGTTCAGCCC                             | PCR for RNA probe against <i>atu1667</i>        |
| 59  | Probe_atu1667_rev | GAAATTAATACGACTCACTATAGGGCATTTCATCTTCCTCTTCG      |                                                 |
| 60  | Probe_atu8161_fwd | CCTCAACAGCCGAGAGCACAG                             | PCR for RNA probe against <i>atu8161</i>        |
| 61  | Probe_atu8161_rev | GAAATTAATACGACTCACTATAGGGTTCATGATCGTTTCCTC        |                                                 |
| 62  | Probe_atu1766_fwd | GGATCAAAGACATGACCATGATACATTATC                    | PCR for RNA probe against <i>atu1766</i>        |
| 63  | Probe_atu1766_rev | GAAATTAATACGACTCACTATAGGGTCGGCCATCATTTGCGGAC      |                                                 |
| 64  | Probe_atu1865_fwd | GGATTTCCCATGCAAAATGATCAACCATTG                    | PCR for RNA probe against <i>atu1865</i>        |
| 65  | Probe_atu1865_rev | GAAATTAATACGACTCACTATAGGGCCGCCACTGCTCAAAACCG      |                                                 |
| 66  | Probe_atu1847_fwd | GCGCAAGATGGATCAATACCTTTTCGACAG                    | PCR for RNA probe against <i>atu1847</i>        |
| 67  | Probe_atu1847_rev | GAAATTAATACGACTCACTATAGGGCCAGGAGAAAAGCTGAGATTTCCG |                                                 |
| 68  | Probe_atu8135_fwd | CGGAAGGATAAGTATCATGCGCACGG                        | PCR for RNA probe against <i>atu8135</i>        |
| 69  | Probe_atu8135_rev | GAAATTAATACGACTCACTATAGGGACGTCGGATCTTCCAACAGG     |                                                 |
| 70  | Probe_pstS_fwd    | CGGCTGCGTCCACAACAAGCCCACG                         | PCR for RNA probe against <i>pstS (atu0420)</i> |
| 71  | Probe_pstS_rev    | GAAATTAATACGACTCACTATAGGGCGATGTCGATGGTGCCTTCGCC   |                                                 |
| 72  | Probe_adh_fwd     | CGACGTCGTCATCGATATCAAATATGCCGG                    | PCR for RNA probe against <i>adh (atu2022)</i>  |
| 73  | Probe_adh_rev     | GAAATTAATACGACTCACTATAGGGTGCCGCAGCCAACGCAGGAATC   |                                                 |
